# Supplementary material for: A critical role for STIM1 in filopodial calcium entry and axon guidance
Source: PubMed Central journal article supplement (PMC3907062; doi:10.1186/1756-6606-6-51), 2013-12-01
Supplement: 1756-6606-6-51-S1.pdf [file 1756-6606-6-51-S1.pdf]

```

X1-STIM1      1  -MLWCRTLLWALCASFLQPSR--PESPTESTE-----EDPMLSEFCRIDKLLCHSTDELLSFEAVMSIHKQMDDDANGSVDVEESDEFLRED
Xt-STIM1      1  -MLCCRTLLWALCASFLQPGR--THSPTETAP-----EDPILIEFCRIDKVLCHNADELLSFEAVMSIHKQMDDDANGNVDVEESDEFLRED
hSTIM1__      1  MDVCVRLALWLWGLLLHQGQSLSSHSEKATGTSSGANSEESTAAEFCRIDKPLCHSEDEKLSFEAVRNIHKTMDDDANGDVDVEESDEFLRED

X1-STIM1      85  LNYHDPTAKHSTFHGEDKLISVEDLWNSWKIISEVYNWTVDEVAQWLITYVELPQYEETFRKLQLSGRDMPRLAIANATMTGTLLKMTDRSQRQKL
Xt-STIM1      85  LNYHDPTAKHSTFHGEDKLISVEDLWNSWKTSEVYNWTVDEVAQWLITYVELPQYEETFRKLQLSGRDMPRLAIANATMTGTLLKMTDRSQRQKL
hSTIM1__      96  LNYHDPTVKHSTFHGEDKLISVEDLWKAWKSSEVYNWTVDEVVQWLITYVELPQYEETFRKLQLSGHAMPRLAVTNTTMTGTVLKMTDRSHRQKL

X1-STIM1      180  QLKALDTVLFGPPLLTRHNHLKDFMLVSIIIGVGGCWFAYIQNRYSKDHMKKMMKDLEGLHRAEQSLHDLQERLQKAQEEHHTVEVEKVHLEKK
Xt-STIM1      180  QLKALDTVLFGPPLLTRHNHLKDFMLVSIVIGVGGCWFAYIQNRYSKDHMKKMMKDLEGLHRAEQSLHDLQERLQKAQEEHRTVEVEKVHLEKK
hSTIM1__      191  QLKALDTVLFGPPLLTRHNHLKDFMLVSIVIGVGGCWFAYIQNRYSKEHMKKMMKDLEGLHRAEQSLHDLQERLHKAQEEHRTVEVEKVHLEKK

X1-STIM1      275  LQNEISLAKQEAQRLRELREGTENELSRQKYAEQELEQVRMALKNAEKELESHSNWSAPDALQKWLQLTHEVEVQYYNIKKQNAEKQLMLAKEGA
Xt-STIM1      275  LQNEISLAKQEAHRLRELREGTENELSRQKYAEQELEQVRMALKNAEKELESHSNWSAPEALQKWLQLTHEVEVQYYNIKKQNAEKQLLLAKEGA
hSTIM1__      286  LRDEINLAKQEAQRLKELREGTENERSRQKYAEEELEQVREALRKAEKELESHSWYAPEALQKWLQLTHEVEVQYYNIKKQNAEKQLLVAKEGA

X1-STIM1      370  EKIKKKRNTLFGTFHVAHSSSLDDVDHKILTAKQALSEVTAALRERLHRWQIETLCGFQIVNNPGLHALMTALNIDPSLMGVSRPAPTHFIMSD
Xt-STIM1      370  EKIKKKRNTLFGTFHVAHSSSLDDVDHKILTAKQALSEVTAALRERLHRWQIETLCGFQIVNNPGLHALMAALNIDPSLMGVSRPAPTHFIMSD
hSTIM1__      381  EKIKKKRNTLFGTFHVAHSSSLDDVDHKILTAKQALSEVTAALRERLHRWQIETLCGFQIVNNPGLHSLVAALNIDPSWMGSTRPNPAHFIMTD

X1-STIM1      465  DIDDLDEIIVSPITMQSPNLS--LRQRHVDSQLALGPQRMPRSQSDRKLSKMEVLMDLSRSDSESSIPYMIEQRVSGHSSKIPSSKALPRTLEEV
Xt-STIM1      465  DIDDLDEEIISPITMQSPNLS--LRQRHVDSQLALGSQR-----DLSRSDSESSLPYVTEPRAGGHTSKIPSSKALPRTLEET
hSTIM1__      476  DVDDMDEEIVSPLSMQSPSLQSSVRQRLTEPQHGLGSQR-----DLTHSDSESSLHMSDRQRVAPKPPQMS--RAADEALNAM

X1-STIM1      558  PSGSQTPNGGNRHLELANVGAG-HESVPESPQMSNKLS-----EKSPSLGEISTAG--TIQSHSDSSRSHSPSSTEADTPSPGTESKHNSKG
Xt-STIM1      542  P-----NGGNRHLELANVSAAAQESLPESPQMGKKLS-----EKAPSLGEISAAG--TAQSHSDSSRSHSPSSTEADTPSP--ESKHNSKG
hSTIM1__      552  TS-----NGRHRLIEGVHPGSL-VEKLPDSPALAKKALLALNHGLDKAHSLMELSPSAPPGGSPHLDSSRSHSPSSPDPDTPSPVGDSRALQASR

X1-STIM1      643  --TRIPQLAGKKAAEDDSGSTGEDTDSVSGKKKLTLKIFKKPKK-
Xt-STIM1      620  GGTRIPQLAGKKAAEDDSGSTGEDTDSLTGKKKLTLKIFKKPKK-
hSTIM1__      641  N-TRIPHLAGKKAEEDNGSIGEETDSSPGRKKFPLKIFKPLKK

```

Additional file 1: Figure S1. (Shim et al.)
