# Supplementary material for: A critical role for STIM1 in filopodial calcium entry and axon guidance
Source: PubMed Central journal article supplement (PMC3907062; doi:10.1186/1756-6606-6-51), 2013-12-01
Supplement: 1756-6606-6-51-S2.pdf [file 1756-6606-6-51-S2.pdf]

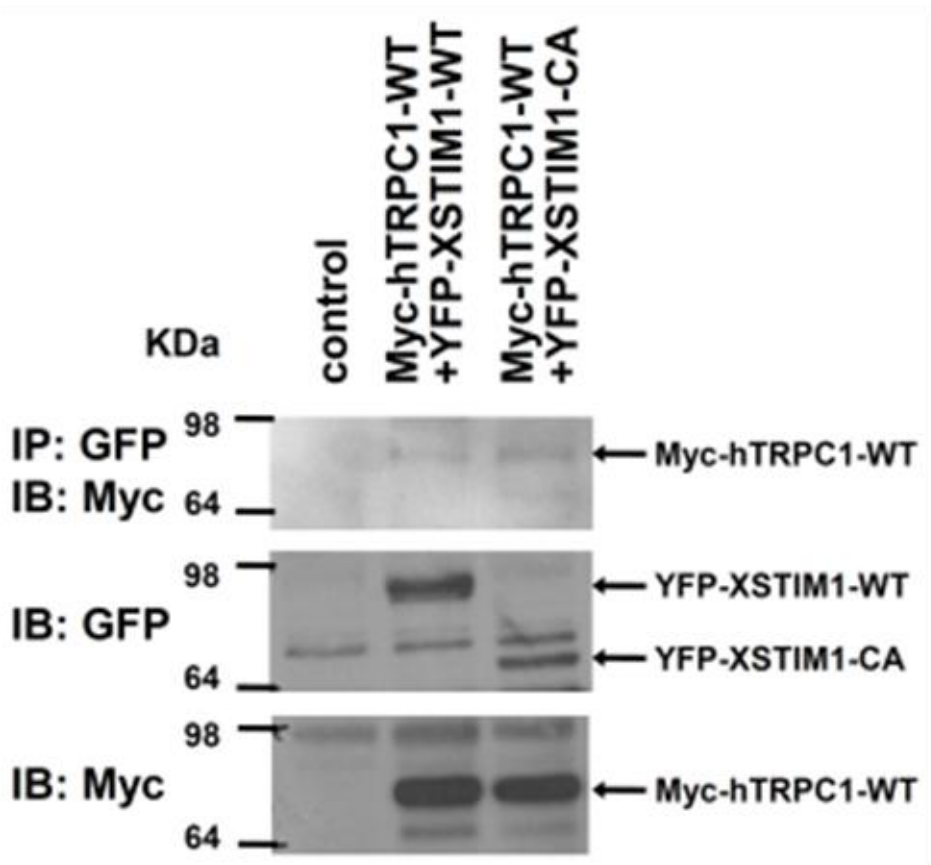

Additional file 2: Figure S2. (Shim et al.)
